# Supplementary material
Source: PubMed Central journal article supplement (PMC4041150)
Supplement: NIHMS581975-supplement-01.pdf [file NIHMS581975-supplement-01.pdf]

```

global lsm
%Test Image 1
%Original Image
OriginalSurface(:, :, 1)=[15,15,15,180,180,150,150,150,150,150;
    20,20,20,10,190,190,190,190,190,175;
    20,20,20,10,180,180,190,185,180,185;
    20,20,20,10,10,185,175,180,180,180];

OriginalSurface(:, :, 2)=[10,185,10,20,20,20,10,20,20,20;
    10,180,180,190,20,20,20,10,10,10;
    10,180,185,185,20,190,190,185,20,20;
    10,190,175,175,15,180,185,190,175,185];

OriginalSurface(:, :, 3)=[20,20,10,10,10,20,20,20,20,20;
    10,20,20,20,20,10,10,20,20,20;
    10,185,20,20,20,20,20,20,30,30;
    10,170,30,30,20,20,20,10,10,10];

OriginalSurface(:, :, 4)=[10,10,10,20,40,20,20,20,30,40;
    60,30,30,30,30,20,30,20,20,20;
    30,30,50,50,50,30,30,30,30,30;
    20,20,30,30,30,20,20,20,20,30];

OriginalBacteria(:, :, 1)=[50,50,30,30,30,50,40,40,30,30;
    30,40,20,20,20,30,50,50,30,70;
    30,70,70,50,50,50,30,30,30,30;
    30,40,40,30,20,20,20,60,50,50];

OriginalBacteria(:, :, 2)=[40,40,40,185,30,30,30,190,40,40;
    40,40,20,20,168,185,179,20,40,40;
    40,20,10,20,190,10,10,10,145,155;
    15,10,10,30,30,20,20,20,30,50];

OriginalBacteria(:, :, 3)=[30,30,20,150,185,20,50,50,50,20;
    180,130,20,145,20,30,30,30,50,50;
    40,20,40,20,129,180,185,175,190,40;
    10,40,40,20,175,20,40,175,20,20];

OriginalBacteria(:, :, 4)=[40,30,40,180,175,50,40,40,30,40;
    15,20,20,160,165,40,180,30,30,40;
    15,40,20,185,190,40,190,160,40,40;
    30,30,30,30,175,175,180,185,30,30];

%Image After Thresholding (Separate Biofilm Components From Background
%Noise)
Surface(:, :, 1)=[0,0,0,1,1,1,1,1,1,1;
    0,0,0,0,1,1,1,1,1,1;
    0,0,0,0,1,1,1,1,1,1;
    0,0,0,0,0,1,1,1,1,1];

Surface(:, :, 2)=[0,1,0,0,0,0,0,0,0,0;
    0,1,1,1,0,0,0,0,0,0;
    0,1,1,1,0,1,1,1,0,0;
    0,1,1,1,0,1,1,1,1,1];

Surface(:, :, 3)=[0,0,0,0,0,0,0,0,0,0;
    0,0,0,0,0,0,0,0,0,0;
    0,1,0,0,0,0,0,0,0,0;
    0,1,0,0,0,0,0,0,0,0];

```

```
Surface(:,:,4)=[0,0,0,0,0,0,0,0,0,0;
                0,0,0,0,0,0,0,0,0,0;
                0,0,0,0,0,0,0,0,0,0;
                0,0,0,0,0,0,0,0,0,0];
```

```
Bacteria(:,:,1)=[0,0,0,0,0,0,0,0,0,0;
                 0,0,0,0,0,0,0,0,0,0;
                 0,0,0,0,0,0,0,0,0,0;
                 0,0,0,0,0,0,0,0,0,0];
```

```
Bacteria(:,:,2)=[0,0,0,1,0,0,0,1,0,0;
                 0,0,0,0,1,1,1,0,0,0;
                 0,0,0,0,1,0,0,0,1,1;
                 0,0,0,0,0,0,0,0,0,0];
```

```
Bacteria(:,:,3)=[0,0,0,1,1,0,0,0,0,0;
                 1,1,0,1,0,0,0,0,0,0;
                 0,0,0,0,1,1,1,1,1,0;
                 0,0,0,0,1,0,0,1,0,0];
```

```
Bacteria(:,:,4)=[0,0,0,1,1,0,0,0,0,0;
                 0,0,0,1,1,0,1,0,0,0;
                 0,0,0,1,1,0,1,1,0,0;
                 0,0,0,0,1,1,1,1,0,0];
```

```
pixelCol=10;
pixelRow=4;
totalpixel=pixelCol.*pixelRow;
%calibration to microns
micronx=0.5;
microny=0.5;
micronz=1;
%Number of image slices
yy=4;
lsm.yy=yy;
```

```
% Connected Volume Filtration (CVF) of the Bacteria and Surface
% Connected volume filtration code was provided open source by Dr. Arne Heydorn in his
% software program COMSTAT. Permission was obtained on March 7, 2012, by Dr. Heydorn to
% use his CVF algorithm. Source code can be obtained by Dr. Heydorn at
www.imageanalysis.dk.
```

```
%
% License for CVF
% Redistribution and use in source and binary forms, with or without
% modification, are permitted provided that the following conditions are met:
%
% 1. If the program is modified, redistributions must include a notice
% indicating that the redistributed program is not identical to the software
% distributed by the Department of Microbiology, Technical University of Denmark.
% Redistributions must also include a notice indicating that the redistributed
% program includes software developed by the Department of Microbiology,
% Technical University of Denmark.
%
% 2. All advertising materials mentioning features or use of this software must
% display the following acknowledgment: This product includes software developed
% by the Department of Microbiology, Technical University of Denmark.
```

```

%
% We also request that use of this software be cited in publications as
%
% Heydorn, A., Nielsen, A.T., Hentzer, M., Sternberg, C., Givskov, M., Ersbøll,
% B.K., Molin, S. (2000) Quantification of biofilm structures by the novel computer
% program COMSTAT. Microbiology 146 (10) 2395-2407
%
% The software is provided "AS-IS" and without warranty of any kind, express,
% implied or otherwise, including without limitation, any warranty of merchantability
% or fitness for a particular purpose. In no event shall the Technical University
% of Denmark or the authors be liable for any special, incidental, indirect or
% consequential damages of any kind, or any damages whatsoever resulting from loss
% of use, data or profits, whether or not advised of the possibility of damage, and
% on any theory of liability, arising out of or in connection with the use or
% performance of this software. This code was written using MATLAB 3.1 (MathWorks,
% www.mathworks.com) and may be subject to certain additional restrictions
% as a result.

%Modification of the CVF code
%April 2012: Stacy Sommerfeld Ross modified the CVF from Dr. Heydorn to fit her
application
%and variables (see below). This modified CVF (MCFV) is used to complete connected
%volume filtration on bacteria grown on uneven surfaces, in this case Surface.
%This code is provided "as is" without warranty.

%Connected Volume Filtration for Bacteria and Surface
BiofilmConnectedtoSurface=zeros(pixelRow, pixelCol, yy);

%Classifying Starting Point for Connected Volume Filtration
BiofilmConnectedtoSurface(:,:,1)=Bacteria(:,:,1); %This allows for any biofilm growing
directly on the substratum
HorizontalGrowthForBacteriaAttachedtoBStart(:,:,1)=Bacteria(:,:,1);

for i = 2:yy;
    commonarea(:,:,i-1)=uint8(Surface(:,:,i-1).*double((Bacteria(:,:,i)>0))); % what pixels
are common between the two layers
    [vectorx,vectory]=find(commonarea(:,:,i-1)); % vectors containing the nonzero elements
of commonarea
    BiofilmConnectedtoSurface(:,:,i)=commonarea(:,:,i-1); % expand the area enherited from
the layer below

HorizontalGrowthForBacteriaAttachedtoBStart(:,:,i)=double(bwselect(Bacteria(:,:,i),vector
y,vectorx,8));
    clear vectorx
    clear vectory
end;

BiofilmConnectedtoSurfaceforSubstratum=BiofilmConnectedtoSurface;
for i=1:yy
    for Rowpixel=1:pixelRow;
        for Colpixel=1:pixelCol;
            if double(BiofilmConnectedtoSurface(Rowpixel,Colpixel,i))==1 &&
double(Surface(Rowpixel,Colpixel,i))==1
                BiofilmConnectedtoSurfaceforSubstratum(Rowpixel,Colpixel,i)=0;
            elseif double(BiofilmConnectedtoSurface(Rowpixel,Colpixel,i))==1 &&
double(Surface(Rowpixel,Colpixel,i))==0
                BiofilmConnectedtoSurfaceforSubstratum(Rowpixel,Colpixel,i)=1;
            elseif double(BiofilmConnectedtoSurface(Rowpixel,Colpixel,i))==0 &&
double(Surface(Rowpixel,Colpixel,i))==0
                BiofilmConnectedtoSurfaceforSubstratum(Rowpixel,Colpixel,i)=0;

```

```

        elseif double(BiofilmConnectedtoSurface(Rowpixel,Colpixel,i))==0 &&
double(Surface(Rowpixel,Colpixel,i))==1
        BiofilmConnectedtoSurfaceforSubstratum(Rowpixel,Colpixel,i)=0;
        end;
    end;
end;

%Modified Substratum Coverage
Substratum_Modified=sum(sum(sum(BiofilmConnectedtoSurfaceforSubstratum(:,:,:)))/(pixelCo
l*pixelRow)*100;

for i=1:yy
    for Rowpixel=1:pixelRow;
        for Colpixel=1:pixelCol;
            if double(Bacteria(Rowpixel,Colpixel,i))==1 &&
double(Surface(Rowpixel,Colpixel,i))==1
                BacteriaColocalized(Rowpixel,Colpixel,i)=1;
            elseif double(Bacteria(Rowpixel,Colpixel,i))==1 &&
double(Surface(Rowpixel,Colpixel,i))==0
                BacteriaColocalized(Rowpixel,Colpixel,i)=0;
            elseif double(Bacteria(Rowpixel,Colpixel,i))==0 &&
double(Surface(Rowpixel,Colpixel,i))==0
                BacteriaColocalized(Rowpixel,Colpixel,i)=0;
            elseif double(Bacteria(Rowpixel,Colpixel,i))==0 &&
double(Surface(Rowpixel,Colpixel,i))==1
                BacteriaColocalized(Rowpixel,Colpixel,i)=0;
            end;
        end;
    end;
end;

for i=1:yy

PercentBacteriaAssociatedwithSurface(i)=sum(sum(BacteriaColocalized(:,:i)))/sum(sum(Bact
eria(:,:i))*100;
    NumberofBacteriaandSurfaceSamePixel(i)=sum(sum(BacteriaColocalized(:,:i)));

VolumeofBacteriaandSurfaceSamePixel(i)=NumberofBacteriaandSurfaceSamePixel(i)*(micronx*mi
crony*micronz);
end;
PercentBacteriaAssociatedwithSurface=PercentBacteriaAssociatedwithSurface';
NumberofBacteriaandSurfaceSamePixel=NumberofBacteriaandSurfaceSamePixel';
VolumeofBacteriaandSurfaceSamePixel=VolumeofBacteriaandSurfaceSamePixel';
TotalBacteriaAssociatedwithSurface=sum(sum(sum(BacteriaColocalized)))/sum(sum(sum(Bacteri
a)))*100;
TotalNumberofBacteriaandSurfaceSamePixel=sum(sum(sum(BacteriaColocalized)));
TotalVolumeofBacteriaandSurfaceSamePixel=TotalNumberofBacteriaandSurfaceSamePixel*(micron
x*microny*micronz);
%Any "NAN - Not a real number" will be made 0.
PercentBacteriaAssociatedwithSurface(isnan(PercentBacteriaAssociatedwithSurface))=0;

for i=1:yy;
    for Rowpixel=1:pixelRow;
        for Colpixel=1:pixelCol;
            if double(BiofilmConnectedtoSurface(Rowpixel,Colpixel,i))==1 ||
double(HorizontalGrowthForBacteriaAttachedtoBStart(Rowpixel,Colpixel,i))==1
                BasisforSubstratum(Rowpixel,Colpixel,i)=1;
            end;
        end;
    end;
end;

```

```

        else
            BasisforSubstratum(Rowpixel,Colpixel,i)=0;
        end;
    end;
end;

%Determine the start points where the Biofilm Attaches to the Surface or
%Substratum
k=1;
for i = 1:yy;
    if sum(sum(BiofilmConnectedtoSurface(:, :, i)))>=1
        StartIndex(k)=i;
        k=k+1;
    end;
end;

%Connect biofilm upward from each starting slice
Storage=zeros(pixelRow, pixelCol, yy);
NN=size(StartIndex);
for q=1:NN(2);
    SliceIndex=StartIndex(q);
    areainthislayer(:, :, 1)=BasisforSubstratum(:, :, SliceIndex);

    for k = SliceIndex:yy-1;
        commonarea3=uint8(areainthislayer(:, :, k-
SliceIndex+1).*double((Bacteria(:, :, k+1)>0))); % what pixels are common between the two
layers
        [vectorx,vectorx]=find(commonarea3); % vectors containing the nonzero elements of
commonarea
        %8 neighborhood connection for above slice
        %allows for horizontal growth of biofilm
        areainthislayer(:, :, k-
SliceIndex+2)=double(bwselect(Bacteria(:, :, k+1),vectorx,vectorx,8));
        BiofilmAttachedtoBiofilm(:, :, k-SliceIndex+1)=areainthislayer(:, :, k-SliceIndex+2);

        %Keep track of where biofilm pixels grew
        for Rowpixel=1:pixelRow;
            for Colpixel=1:pixelCol;
                if BiofilmAttachedtoBiofilm(Rowpixel,Colpixel,k-SliceIndex+1)==1
                    Storage(Rowpixel, Colpixel, k+1)=1;
                end;
            end;
        end;
    end;

end;

end;

%Put together the starting point BiofilmConnectedtoSurface and the
BiofilmAttachedtoBiofilm in Storage
filt_images=zeros(pixelRow,pixelCol,yy);
for i = 1:yy;
    for Rowpixel=1:pixelRow;
        for Colpixel=1:pixelCol;

```

```

        if double(BiofilmConnectedtoSurface(Rowpixel,Colpixel,i)) ||
double(BasisforSubstratum(Rowpixel,Colpixel,i)) ==1 ||
double(Storage(Rowpixel,Colpixel,i)) ==1
            filt_images(Rowpixel,Colpixel,i)=1;

        end;
    end;
end;

%Quantification
UnconnectedBacteriaPixel=zeros(max(max(pixelRow)), max(max(pixelCol)), max(max(yy)));
ConnectedBiofilmBacteriaPixel=zeros(max(max(pixelRow)), max(max(pixelCol)), max(max(yy)));
AllSurfacePixels=double(Surface);
AllBacteriaPixels=double(Bacteria);

for i=1:yy;
    for Rowpixel=1:pixelRow;
        for Colpixel=1:pixelCol;

            if AllBacteriaPixels(Rowpixel, Colpixel,i)==1 && filt_images(Rowpixel,
Colpixel,i) ==1;
                ConnectedBiofilmBacteriaPixel(Rowpixel, Colpixel,i)=1;
                UnconnectedBacteriaPixel(Rowpixel, Colpixel,i)=0;
            elseif AllBacteriaPixels(Rowpixel, Colpixel,i)==1 &&
filt_images(Rowpixel, Colpixel,i) ==0;
                ConnectedBiofilmBacteriaPixel(Rowpixel, Colpixel,i)=0;
                UnconnectedBacteriaPixel(Rowpixel, Colpixel,i)=1;
            elseif AllBacteriaPixels(Rowpixel, Colpixel,i)==0 &&
filt_images(Rowpixel, Colpixel,i) ==0 || AllBacteriaPixels(Rowpixel, Colpixel,i)==0 &&
filt_images(Rowpixel, Colpixel,i) ==1;
                ConnectedBiofilmBacteriaPixel(Rowpixel, Colpixel,i)=0;
                UnconnectedBacteriaPixel(Rowpixel, Colpixel,i)=0;

            end;

        end;
    end;
end;

%Preallocate space
AreaConnectedBiofilmBacteriaBySlice=zeros( max(max(yy)), 1);
AreaUnconnectedBacteriaBySlice=zeros( max(max(yy)), 1);
AreaSurfacebySlice=zeros(max(max(yy)), 1);
AreaPSurfacebySlice=zeros(max(max(yy)), 1);
TotSurfaceBySlice=zeros(max(max(yy)), 1);
TotConnectedBiofilmBacteriaBySlice=zeros(max(max(yy)), 1);
TotUnconnectedBacteriaBySlice=zeros(max(max(yy)), 1);
AreaPercentConnectedBiofilmBacteriaBySlice=zeros(max(max(yy)), 1);
AreaPercentUnconnectedBacteriBySlice=zeros(max(max(yy)), 1);
TotalinMicrons=micronx*microny*pixelCol*pixelRow;

%Surface
AreaSurfaceOverall=sum(sum(sum(Surface(:,:,:) )))*micronx*microny;
AreaPSurfaceOverall=AreaSurfaceOverall/(TotalinMicrons*yy)*100;
TotSurface=sum(sum(sum(Surface(:,:,:) )));

%Bacteria

```

```

AreaConnectedBiofilmBacteria=sum(sum(sum(ConnectedBiofilmBacteriaPixel(:,:,:))))*micronx*
microny;

AreaUnconnectedBacteria=sum(sum(sum(UnconnectedBacteriaPixel(:,:,:))))*micronx*microny;

AreaPercentConnectedBiofilmBacteria=AreaConnectedBiofilmBacteria/(TotalinMicrons*yy)*100;
AreaPercentUnconnectedBacteria=AreaUnconnectedBacteria/(TotalinMicrons*yy)*100;
TotConnectedBiofilmBacteria=sum(sum(sum(ConnectedBiofilmBacteriaPixel(:,:,:)))));
TotUnconnectedBacteria=sum(sum(sum(UnconnectedBacteriaPixel(:,:,:)))));

for i=1:yy;
    %Surface
    AreaSurfacebySlice(i)=sum(sum(Surface(:,:,i)))*micronx*microny;
    AreaPSurfacebySlice(i)=AreaSurfacebySlice(i)/TotalinMicrons*100;
    TotSurfaceBySlice(i)=sum(sum(sum(Surface(:,:,i))));

    %Bacteria

    AreaConnectedBiofilmBacteriaBySlice(i)=sum(sum(ConnectedBiofilmBacteriaPixel(:,:,i))*mic
ronx*microny;

    AreaUnconnectedBacteriaBySlice(i)=sum(sum(UnconnectedBacteriaPixel(:,:,i))*micronx*micro
ny;

    AreaPercentConnectedBiofilmBacteriaBySlice(i)=AreaConnectedBiofilmBacteriaBySlice(i)/Tota
linMicrons*100;

    AreaPercentUnconnectedBacteriBySlice(i)=AreaUnconnectedBacteriaBySlice(i)/TotalinMicrons*
100;

    TotConnectedBiofilmBacteriaBySlice(i)=sum(sum(sum(ConnectedBiofilmBacteriaPixel(:,:,i))));
    TotUnconnectedBacteriaBySlice(i)=sum(sum(sum(UnconnectedBacteriaPixel(:,:,i))));

end;

%Saving the Data
StackIndex=1;
lsm.slice=yy;
header={'Publication'};
filename=horzcat(num2str(StackIndex), '.xlsx');
colnames={'','Number of Connected Biofilm Pixels', 'Area Connected Biofilm, um^2', 'Area
Connected Biofilm, %', 'Number of Unconnected Bacteria Pixels', 'Area Unconnected
Bacteria, um^2', 'Area Unconnected Bacteria, %', 'Number of Surface Pixels', 'Area Surface,
um^2', 'Area Surface, %', 'Number Bacteria and Surface Pixels the Same', 'Volume Bacteria
and Surface Pixels the Same', 'Pecent Bacteria Associated with Surface, %', 'Modified
Substratum Coverage, %'};

%Biofilm Associated Bacteria
GA=vertcat(AreaConnectedBiofilmBacteria, AreaConnectedBiofilmBacteriaBySlice(:));
SubstratumSave=vertcat(Substratum_Modified,0);
TotalConnectedBiofilmBacteria=vertcat(TotConnectedBiofilmBacteria,TotConnectedBiofilmBact
eriaBySlice(:));
AreaPercentBio=vertcat(AreaPercentConnectedBiofilmBacteria,
AreaPercentConnectedBiofilmBacteriaBySlice(:));
AssociatedBacteria=vertcat(TotalBacteriaAssociatedwithSurface,
PercentBacteriaAssociatedwithSurface(:));

```

```
NumberAssociated=vertcat(TotalNumberOfBacteriaandSurfaceSamePixel,NumberOfBacteriaandSurfaceSamePixel(:));
```

```
VolumeAssociated=vertcat(TotalVolumeofBacteriaandSurfaceSamePixel,VolumeofBacteriaandSurfaceSamePixel(:));
```

#### %Non-Biofilm Associated Bacteria

```
FGA=vertcat(AreaUnconnectedBacteria,AreaUnconnectedBacteriaBySlice(:));
```

```
TotalUnconnectedBacteria=vertcat(TotUnconnectedBacteria,
```

```
TotUnconnectedBacteriaBySlice(:));
```

```
AreaPercentUnconnectedBacteriaCombined=vertcat(AreaPercentUnconnectedBacteria,
```

```
AreaPercentUnconnectedBacteriBySlice(:));
```

#### %Surface

```
TA=vertcat(AreaSurfaceOverall, AreaSurfacebySlice(:));
```

```
TotalSurface=vertcat(TotSurface, TotSurfaceBySlice(:));
```

```
SurfacePercent=vertcat( AreaPSurfaceOverall, AreaPSurfacebySlice(:));
```

```
%Thank you to Scott Hirsch (MathWorks, Natick, MA) for providing permission
```

```
% to use his xlswrite code in this application.
```

```
(http://www.mathworks.com/matlabcentral/fileexchange/2855-xlswrite)
```

```
%See xlswrite_BMT_Example.m for license information.
```

```
xlswrite_Image(StackIndex,TotalConnectedBiofilmBacteria, GA,
```

```
AreaPercentBio,TotalUnconnectedBacteria, FGA, AreaPercentUnconnectedBacteriaCombined,
```

```
TotalSurface, TA, SurfacePercent, NumberAssociated, VolumeAssociated, AssociatedBacteria,
```

```
SubstratumSave, header, colnames, filename);
```

#### %Generating ".tif" Sequences of Components

```
FinalConnectedBiofilmBacteria=zeros(max(max(pixelRow)), max(max(pixelCol)), max(max(yy)));
```

```
FinalUnconnectedBacteria=zeros(max(max(pixelRow)), max(max(pixelCol)), max(max(yy)));
```

```
folder=['Sample', int2str(StackIndex)];
```

```
parentfolderConnectedBiofilm=strcat(folder, '\ConnectedBiofilmBacteriaImages\');
```

```
parentfolderUnconnectedBacteria=strcat( folder, '\UnconnectedBacteriaImages\');
```

```
parentfolderOverall=strcat( folder, '\OverallBacteriaImages\');
```

```
parentfolderSurface=strcat( folder, '\SurfaceImages\');
```

```
parentfolderBacteriaSurface=strcat( folder, '\BacteriaAssociatedWithSurfaceImages\');
```

```
parentfolderBacteriaStars=strcat( folder, '\ModifiedSubstratumCoverageBacteria\');
```

```
mkdir(parentfolderConnectedBiofilm);
```

```
mkdir(parentfolderUnconnectedBacteria);
```

```
mkdir(parentfolderOverall);
```

```
mkdir(parentfolderSurface);
```

```
mkdir(parentfolderBacteriaSurface);
```

```
mkdir(parentfolderBacteriaStars);
```

```
for i=1:yy;
```

```
FinalConnectedBiofilmBacteria(:, :, i)=ConnectedBiofilmBacteriaPixel(:, :, i).*double(OriginalBacteria(:, :, i));
```

```
name = ['ConnectedBiofilmBacteria',int2str(i),'.tif'];
```

```
filename= strcat(parentfolderConnectedBiofilm, name);
```

```
imwrite(uint8(FinalConnectedBiofilmBacteria(:, :, i)),filename, 'tiff');
```

```
FinalUnconnectedBacteria(:, :, i)=UnconnectedBacteriaPixel(:, :, i).*double(OriginalBacteria(:, :, i));
```

```
name = ['UnconnectedBacteria',int2str(i),'.tif'];
```

```
filename= strcat(parentfolderUnconnectedBacteria, name);
```

```
imwrite(uint8(FinalUnconnectedBacteria(:, :, i)),filename, 'tiff');
```



```

end;

FinalOverallBacteria=zeros(max(max(pixelRow)), max(max(pixelCol)), max(max(yy)));
FinalSurface=zeros(max(max(pixelRow)), max(max(pixelCol)), max(max(yy)));
FinalBacteriaAssociatedWithSurface=zeros(max(max(pixelRow)), max(max(pixelCol)),
max(max(yy)));

for i=1:yy;

FinalOverallBacteria(:,:,i)=AllBacteriaPixels(:,:,i).*double(OriginalBacteria(:,:,i));
    name = ['OverallBacteria',int2str(i),'.tif'];
    filename= strcat(parentfolderOverall, name);
    imwrite(uint8(FinalOverallBacteria(:,:,i)),filename,'tiff');
FinalSurface(:,:,i)=double(Surface(:,:,i)).*double(OriginalSurface(:,:,i));
    name = ['Surface',int2str(i),'.tif'];
    filename= strcat(parentfolderSurface, name);
    imwrite(uint8(FinalSurface(:,:,i)),filename,'tiff');

FinalBacteriaAssociatedWithSurface(:,:,i)=double(BacteriaColocalized(:,:,i)).*double(OriginalBacteria(:,:,i));
    name = ['BacteriaAssociatedWithSurface',int2str(i),'.tif'];
    filename= strcat(parentfolderBacteriaSurface, name);
    imwrite(uint8(FinalBacteriaAssociatedWithSurface(:,:,i)),filename,'tiff');

FinalBacteriaStars(:,:,i)=double(BiofilmConnectedtoSurface(:,:,i)).*double(OriginalBacteria(:,:,i));
    name = ['ModifiedSubstratumCoverageBacteria',int2str(i),'.tif'];
    filename= strcat(parentfolderBacteriaStars, name);
    imwrite(uint8(FinalBacteriaStars(:,:,i)),filename,'tiff');

end;

```
